# Supplementary material
Source: publisher figshare collection journal article supplement (https://acs.figshare.com/ndownloader/files/15077954)
Supplement: Supplementary file 1 [file 15077954]

## Supporting Information for

### Electrochemically synthesized porous Ag double-layers for SERS applications

Yawen Zhan,<sup>a,b,c,d</sup> Shiwei Shu,<sup>a,b</sup> Chun-Kwan Tsang,<sup>a,b</sup> Chris Lee,<sup>a,b</sup> Qingguo Shao,<sup>a,b</sup> Jian Lu,<sup>b,c,d,e,\*</sup>  
and Yang Yang Li<sup>a,b,c,d,\*</sup>

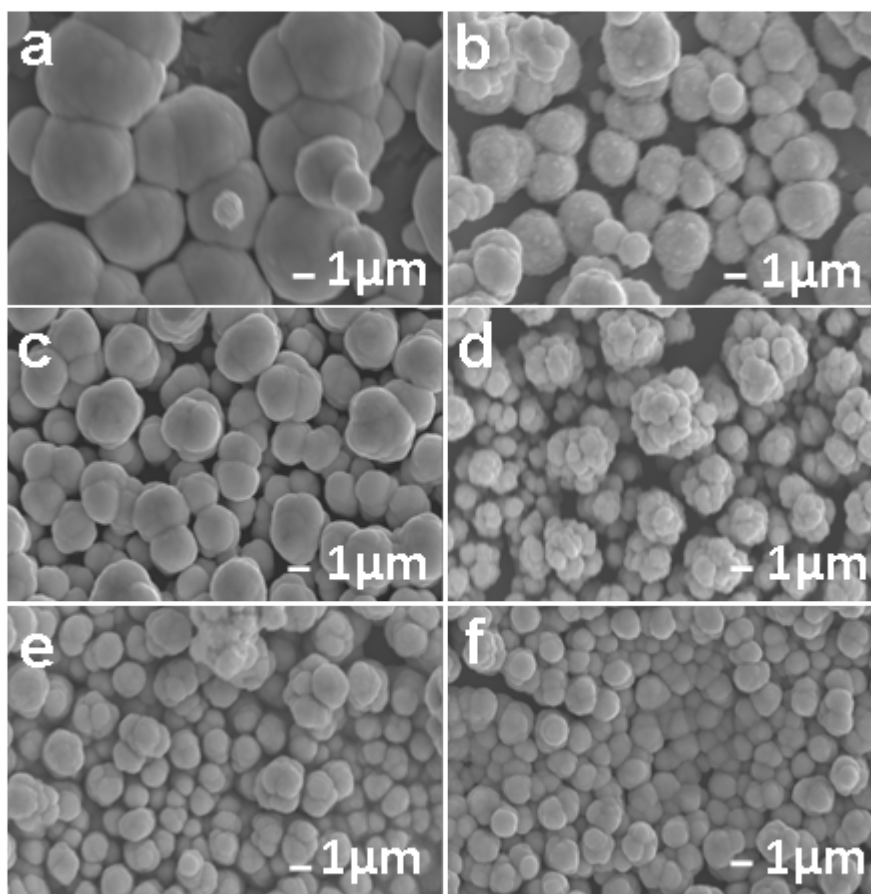

**Figure S1.** SEM images of AgCu alloy electrodeposited at a) - 0.2 V; b) -0.3 V; c) -0.4 V; d) -0.5 V; e) -0.6 V; (f) -0.7 V. The scale bar: 1  $\mu\text{m}$ .

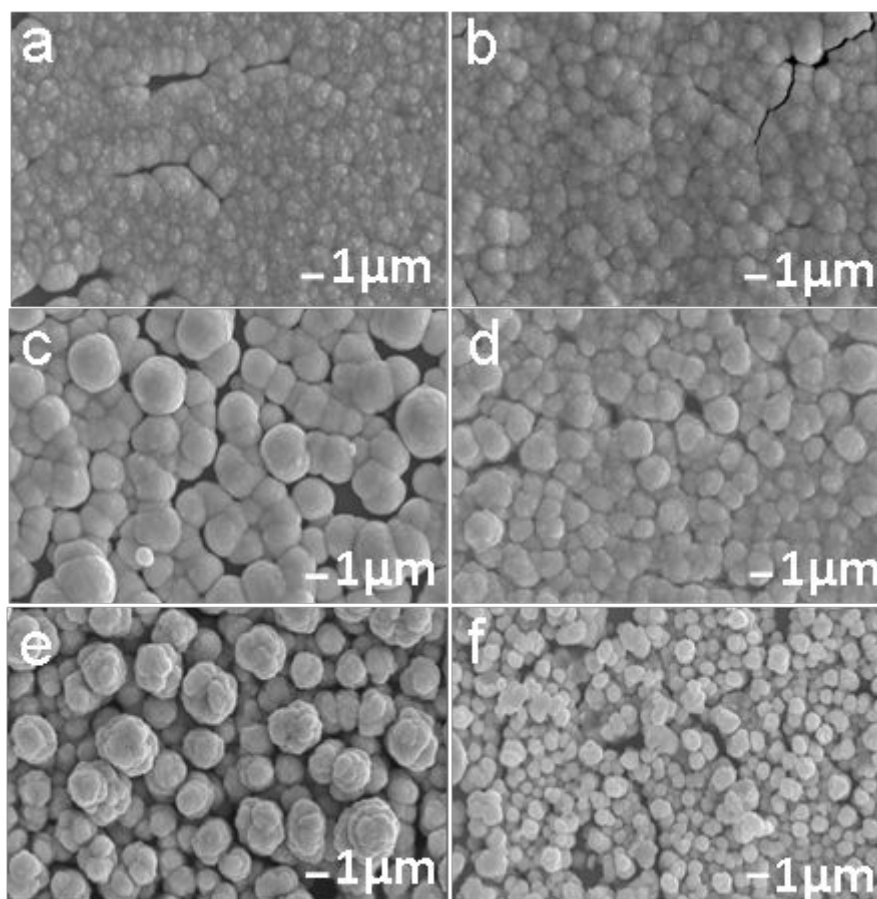

**Figure S2.** a) SEM images of AgCu alloy electrodeposited with saccharin ( $C_7H_5NO_3S$ ) added in the electrolyte at a) -0.2 V; b) -0.3 V; c) -0.4 V; d) -0.5 V; e) -0.6 V; f) -0.7 V. The scale bar: 1 μm.

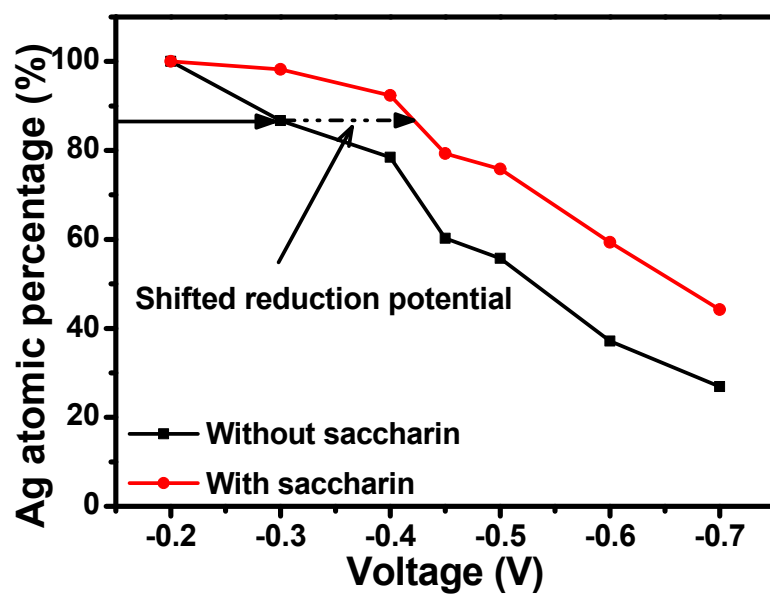

**Figure S3.** Silver content of the AgCu alloy electrodeposited with or without saccharin added in the electrolyte.

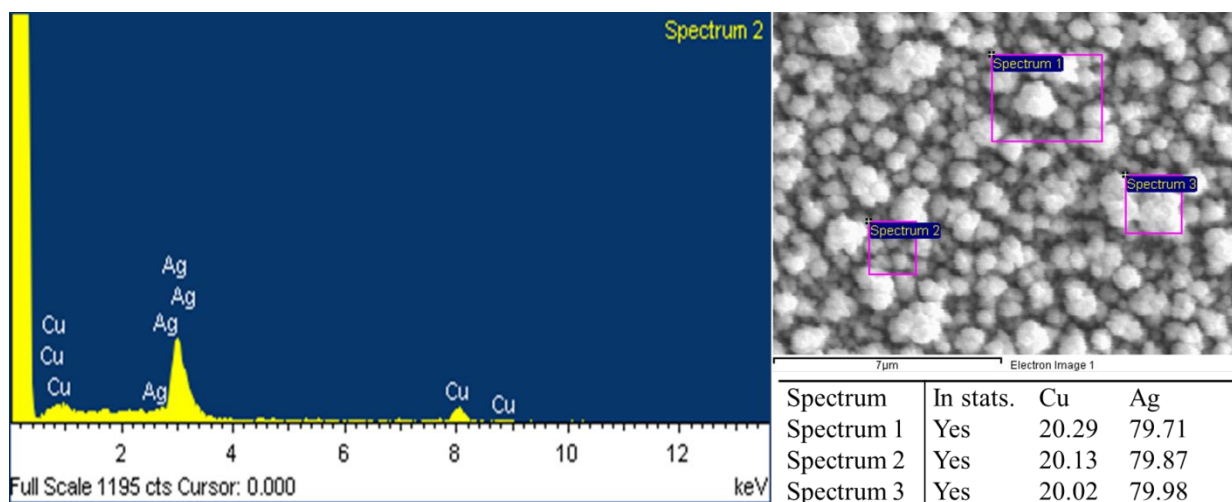

**Figure S4.** EDX spectrum and the corresponding SEM image of the AgCu alloy electrodeposited at -0.4 V.

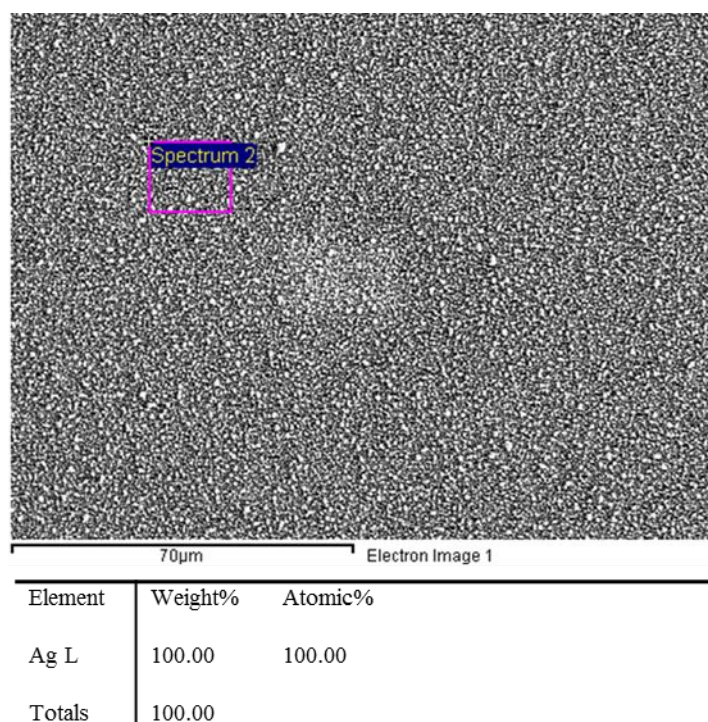

**Figure S5.** The EDX measurement result and the corresponding SEM image of the AgCu alloy after dealloyed in diluted H<sub>2</sub>SO<sub>4</sub> (0.05 M).

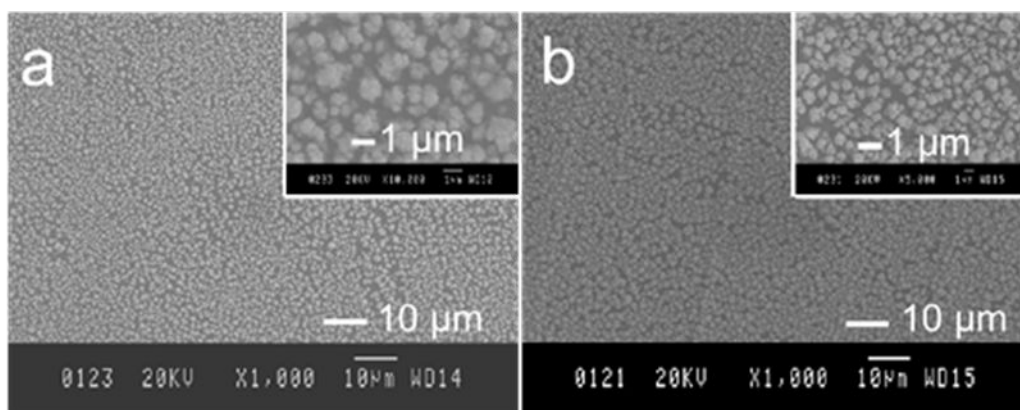

**Figure S6.** Top-view SEM images of the electrodeposited double layers with higher Cu content in the top (a) or bottom (b) layer (before dealloy treatment).

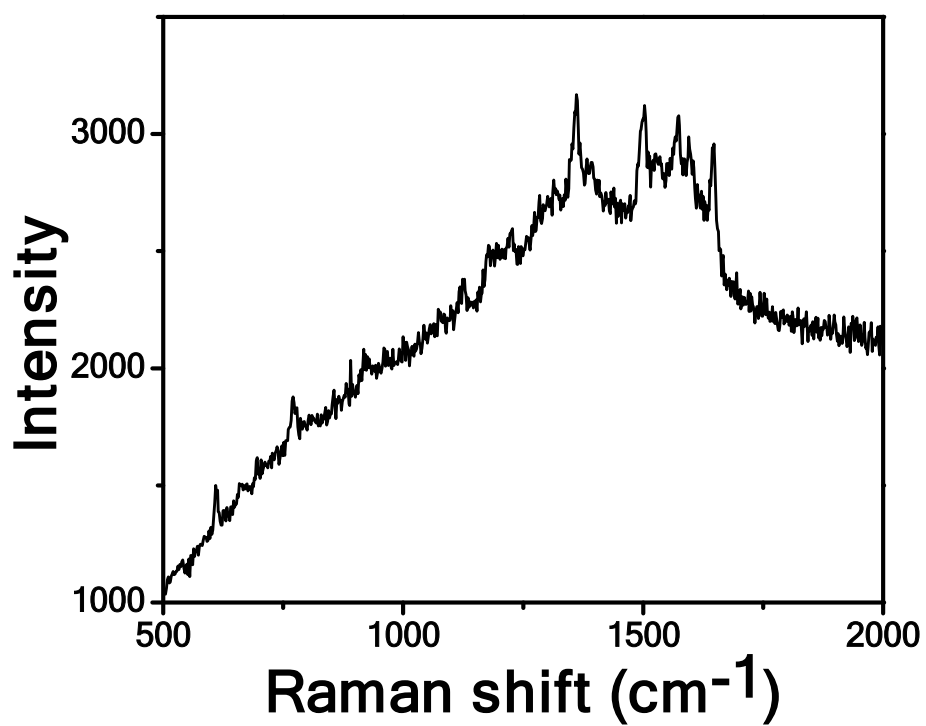

**Figure S7.** The Raman spectrum of Rhodamine 6G ( $10^{-2}$  M) on silicon wafer.

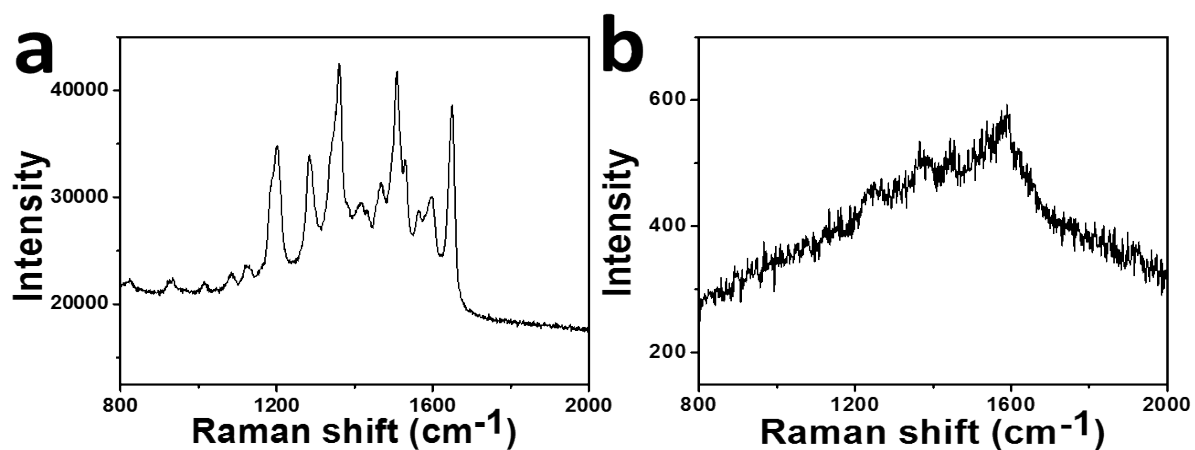

**Figure S8.** The Raman spectra taken on the double layered film with big pores at top that was pre-soaked in the Rhodamine b ( $10^{-6}$  M) solution, before (a) and after (b) sonication in water.



### Calculation of enhancement factor (EF)

The enhancement factor ( $EF$ ) is calculated from the experimental results. The  $EF$  values of porous Ag films were determined using Rhodamine 6G (R6G) as probe:

$$EF = (I_{SERS} / N_{SERS}) / (I_{bulk} / N_{bulk})$$

Where  $N_{SERS}$  and  $N_{bulk}$  are the number of R6G molecules probed on the porous Ag film and on silicon wafer, respectively;  $I_{SERS}$  and  $I_{bulk}$  are the Raman peak intensity of R6G at 1650  $\text{cm}^{-1}$ .  $N_{bulk}$  was calculated based on the concentration of the R6G aqueous solution ( $10^{-2}$  M) and the Raman scattering volume (the laser spot is ca. 2  $\mu\text{m}$  in diameter and the penetration depth is ca. 20  $\mu\text{m}$ ) (Fig. S8). Similarly,  $N_{SERS}$  is calculated from the concentration of the R6G aqueous solution ( $10^{-8}$  M) and the drop volume (2  $\mu\text{l}$ ) on the sample.
